# Supplementary material for: Preparation and Application of Standardized Typical Volatile Components Fraction from Turmeric (Curcuma longa L.) by Supercritical Fluid Extraction and Step Molecular Distillation
Source: PubMed Central journal article supplement (PMC6099931; doi:10.3390/molecules23071831), 2018-07-23
Supplement: molecules-23-01831-s001.pdf [file molecules-23-01831-s001.pdf]

**Table S1 Summary for the tested samples of *C. longa***

| <b>No.</b> | <b>Code</b> | <b>Samples</b>  | <b>Sources</b>     | <b>Collection date</b> |
|------------|-------------|-----------------|--------------------|------------------------|
| 1          | JH-1        | <i>C. longa</i> | Wenshan, Yunana    | 2008                   |
| 2          | JH-2        | <i>C. longa</i> | Chengdu, Sichuan   | 2008                   |
| 3          | JH-3        | <i>C. longa</i> | Chongzhou, Sichuan | 2007                   |
| 4          | JH-4        | <i>C. longa</i> | Chengdu, Sichuan   | 2008                   |
| 5          | JH-5        | <i>C. longa</i> | Chengdu, Sichuan   | 2014                   |
| 6          | JH-6        | <i>C. longa</i> | Chengdu, Sichuan   | 2014                   |
| 7          | JH-7        | <i>C. longa</i> | Chengdu, Sichuan   | 2014                   |
| 8          | JH-8        | <i>C. longa</i> | Chengdu, Sichuan   | 2014                   |
| 9          | JH-9        | <i>C. longa</i> | Chengdu, Sichuan   | 2014                   |
| 10         | JH-10       | <i>C. longa</i> | Chengdu, Sichuan   | 2014                   |
| 11         | JH-11       | <i>C. longa</i> | Chengdu, Sichuan   | 2014                   |
| 12         | JH-12       | <i>C. longa</i> | Chengdu, Sichuan   | 2014                   |
| 13         | JH-13       | <i>C. longa</i> | Chengdu, Sichuan   | 2014                   |
| 14         | JH-14       | <i>C. longa</i> | Chengdu, Sichuan   | 2014                   |
| 15         | JH-15       | <i>C. longa</i> | Chengdu, Sichuan   | 2009                   |
| 16         | JH-16       | <i>C. longa</i> | Chengdu, Sichuan   | 2014                   |
| 17         | JH-17       | <i>C. longa</i> | Chengdu, Sichuan   | 2008                   |
| 18         | JH-18       | <i>C. longa</i> | Jiaqing, Sichuan   | 2008                   |
| 19         | JH-19       | <i>C. longa</i> | Xinyi, Sichuan     | 2008                   |
